# Supplementary material for: Recombinant Human Elastase Alters the Compliance of Atherosclerotic Tibial Arteries After Ex Vivo Angioplasty
Source: PubMed Central journal article supplement — J Cardiovasc Pharmacol. 2016 Apr 7;67(4):305–11. doi: 10.1097/FJC.0000000000000354 (PMC4827324; doi:10.1097/fjc.0000000000000354), 2016-04-07

Figure 1S. Pressure-compliance curves of atherosclerotic anterior (A) and posterior (B) tibial arteries prior to and following treatment with vehicle (PBSP).

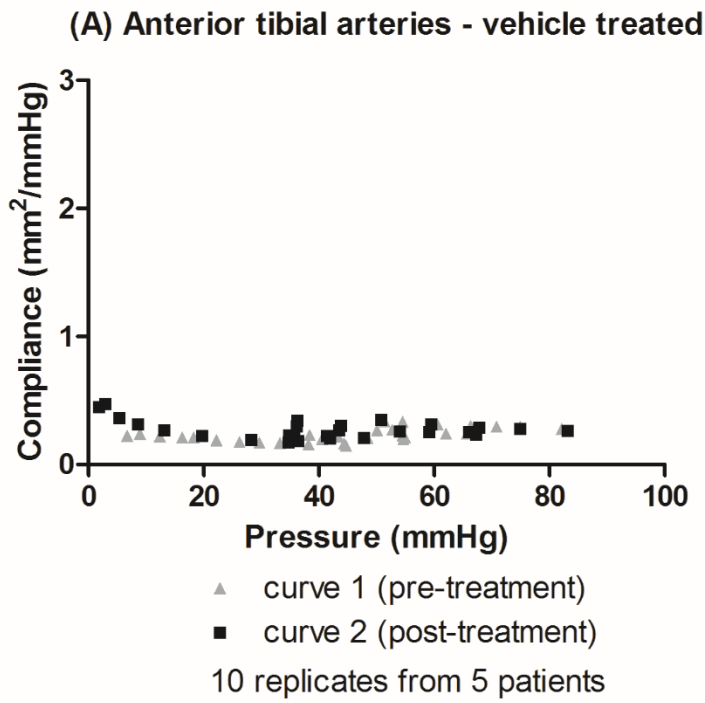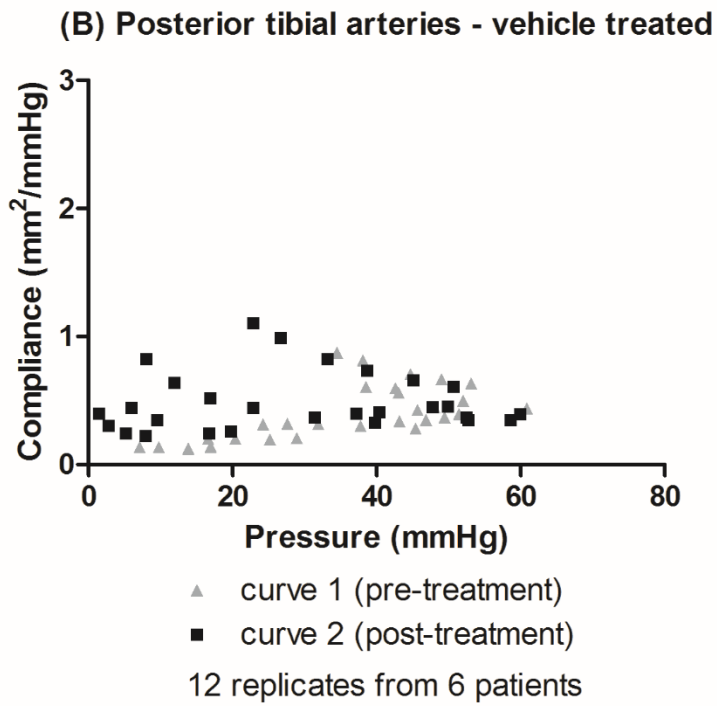

Supplement: jcvp-67-305-s001.pdf [file jcvp-67-305-s001.pdf]
