# Supplementary material for: Recombinant Human Elastase Alters the Compliance of Atherosclerotic Tibial Arteries After Ex Vivo Angioplasty
Source: PubMed Central journal article supplement — J Cardiovasc Pharmacol. 2016 Apr 7;67(4):305–11. doi: 10.1097/FJC.0000000000000354 (PMC4827324; doi:10.1097/fjc.0000000000000354), 2016-04-07

Figure 2S. Stress-strain curves of atherosclerotic anterior (A) and posterior (B) tibial arteries before and following treatment with vonapanitase and anterior (C) and posterior (D) tibial arteries prior to and following treatment with vehicle (PBSP).

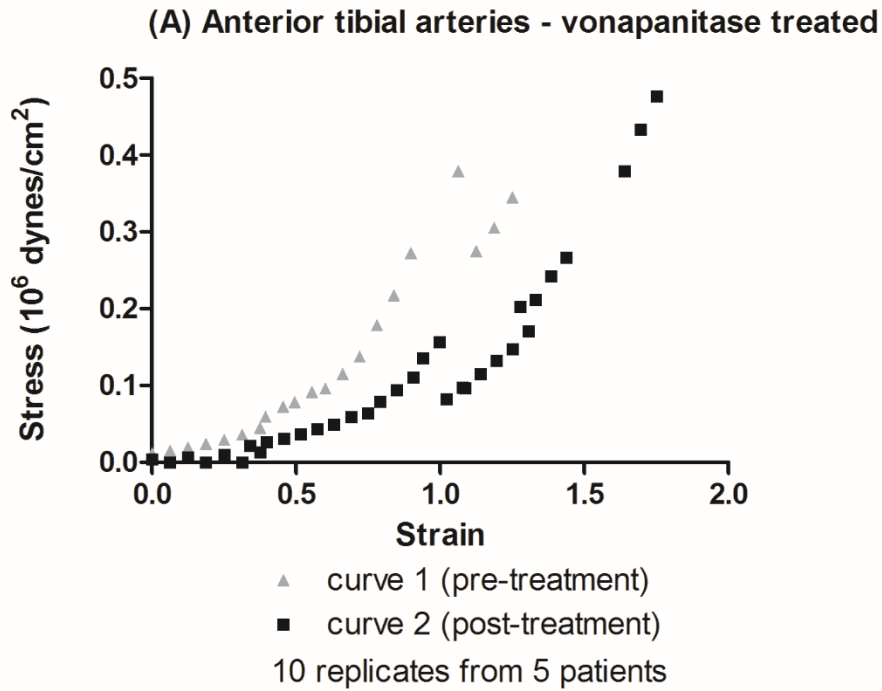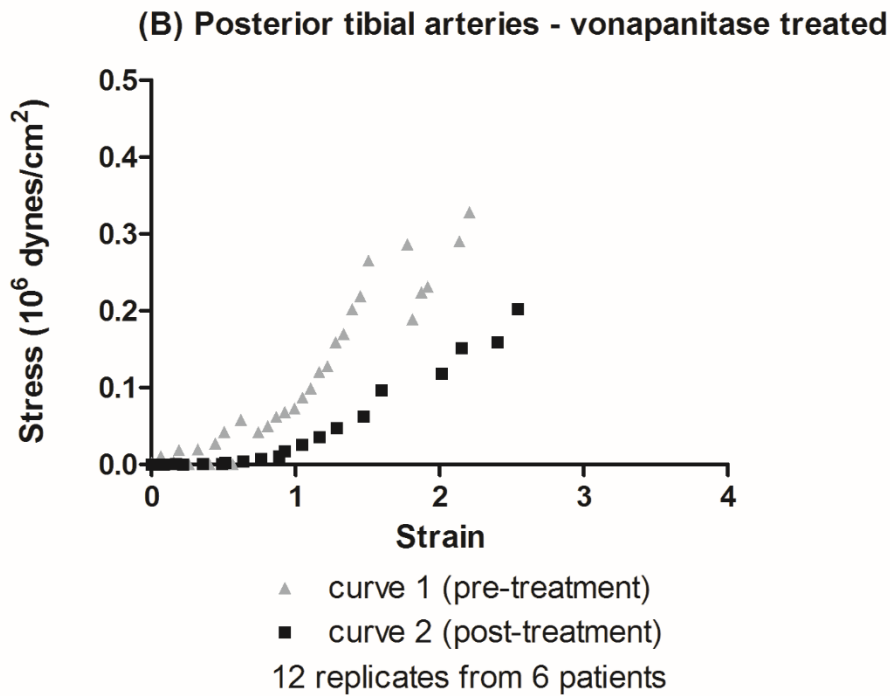

(C) Anterior tibial arteries - vehicle treated

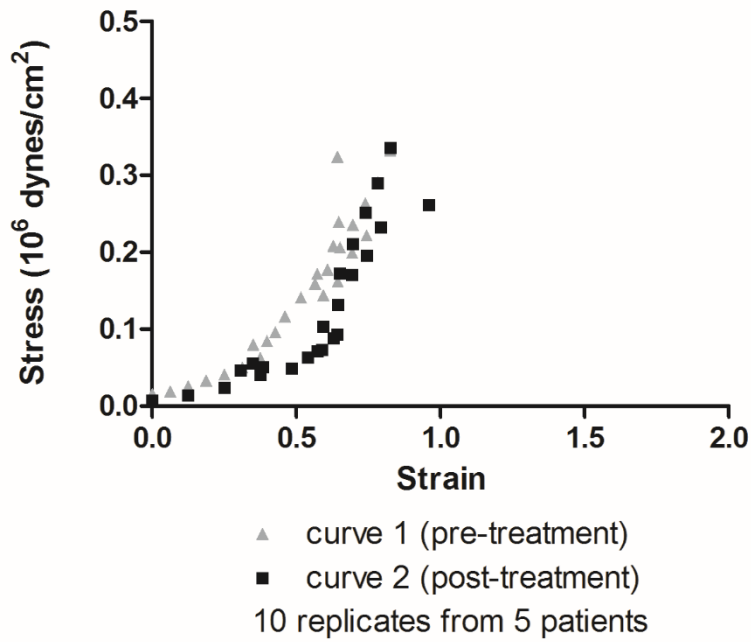

(D) Posterior tibial arteries - vehicle treated

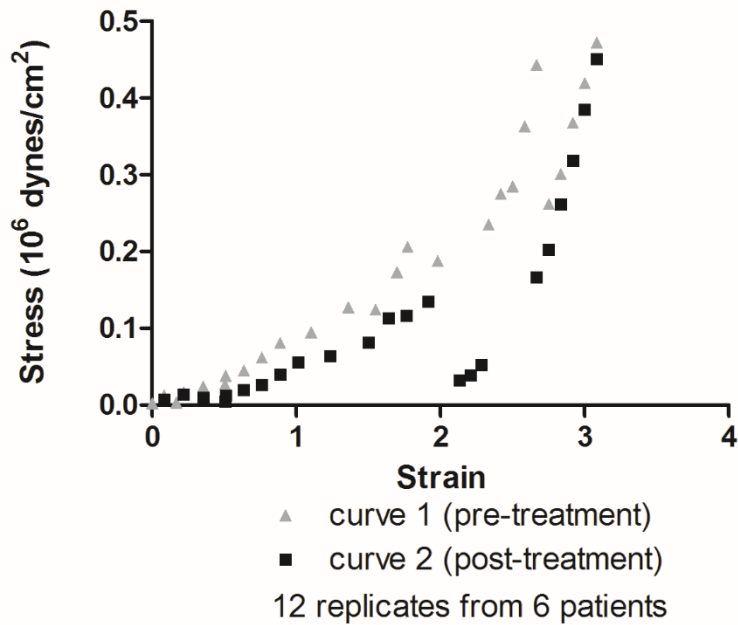

Supplement: jcvp-67-305-s002.pdf [file jcvp-67-305-s002.pdf]
