# Supplementary material for: Recombinant Human Elastase Alters the Compliance of Atherosclerotic Tibial Arteries After Ex Vivo Angioplasty
Source: PubMed Central journal article supplement — J Cardiovasc Pharmacol. 2016 Apr 7;67(4):305–11. doi: 10.1097/FJC.0000000000000354 (PMC4827324; doi:10.1097/fjc.0000000000000354), 2016-04-07

Figure 3S. Atherosclerotic anterior and posterior tibial artery (with higher pressures) curves for Diameter-Pressure prior to and following treatment with vehicle (PBSP)(A) and vonapanitase (B); Compliance curves prior to and following treatment with vehicle (PBSP) (C) and vonapanitase (D); Stress-strain curves prior to and following treatment with vehicle (PBSP)(E) and vonapanitase (F).

**(A) Anterior, posterior tibial artery - vehicle treated**

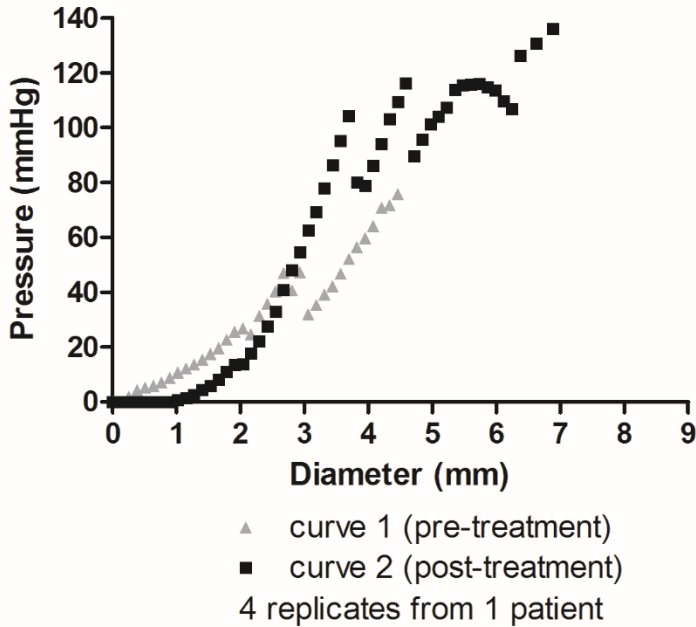

**(B) Anterior, posterior tibial artery - vonapanitase treated**

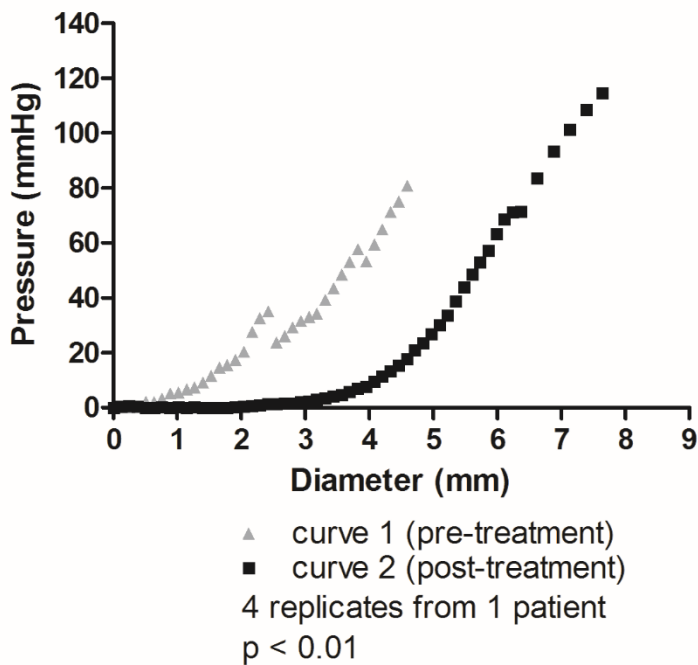

(C) Anterior, posterior tibial arteries - vehicle treated

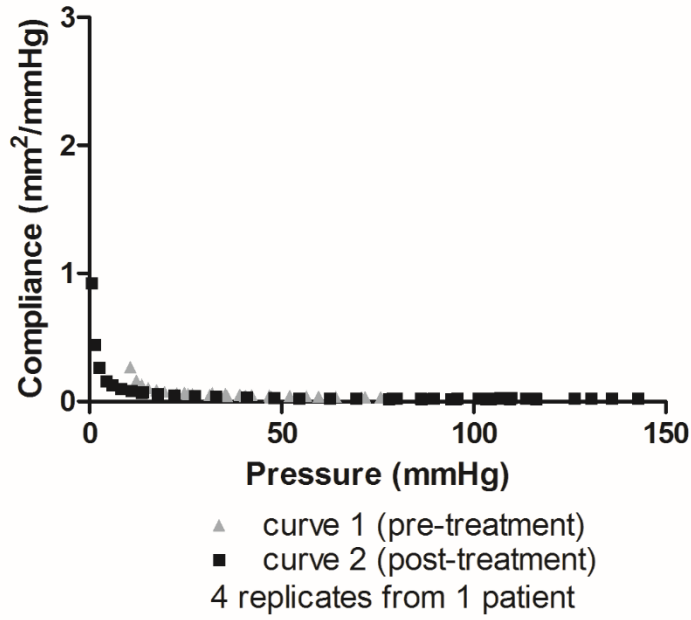

(D) Anterior, posterior tibial arteries - vonapanitase treated

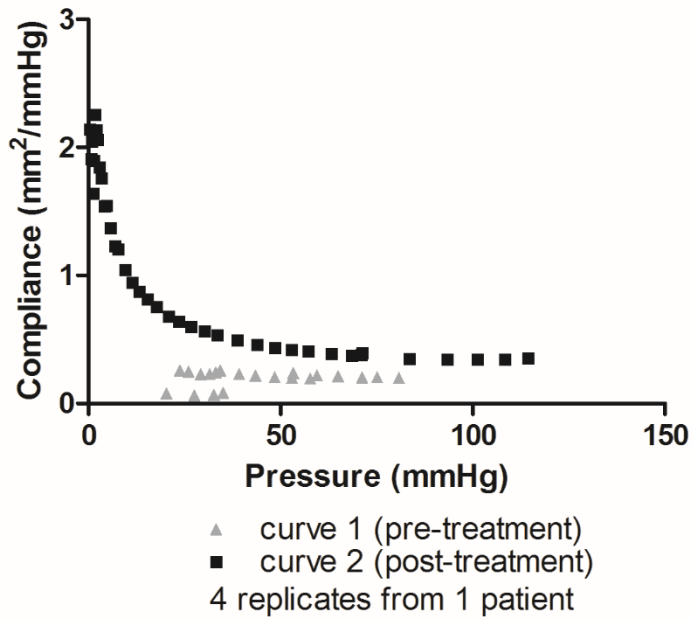

(E) Anterior, posterior tibial arteries - vehicle treated

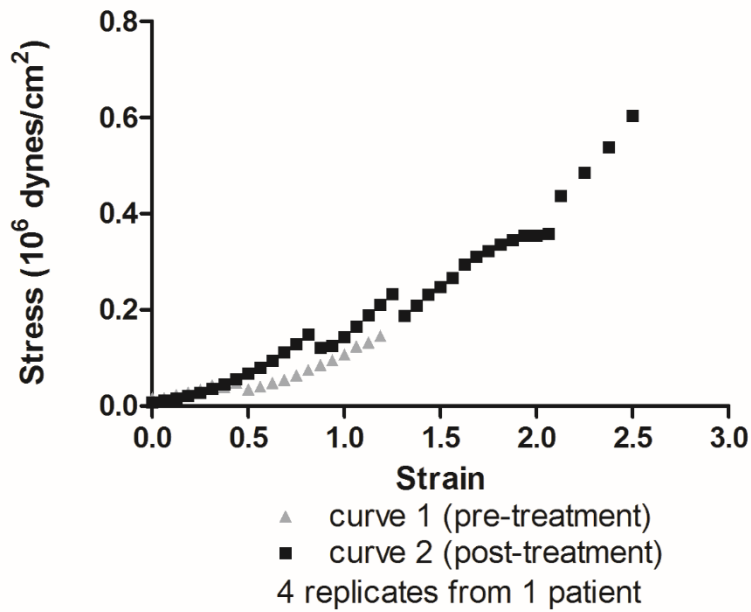

(F) Anterior, posterior tibial arteries - vonapanitase treated

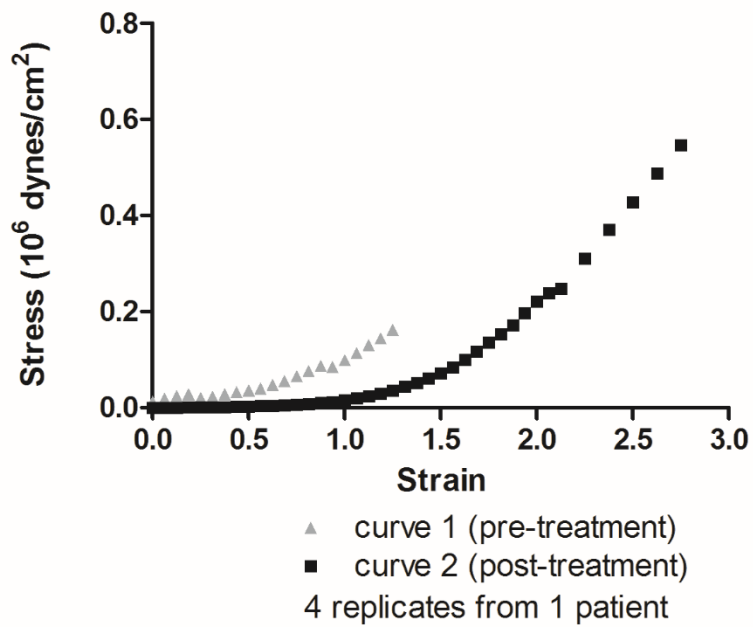

Supplement: jcvp-67-305-s003.pdf [file jcvp-67-305-s003.pdf]
